# Supplementary material for: Construction and Validation of the Prognostic Model for Patients With Neuroendocrine Cervical Carcinoma: A Competing Risk Nomogram Analysis
Source: Research Square preprint supplement (doi:10.21203/rs.3.rs-127105/v1), 2020-12-23
Supplement: Supplementary file 1 [file bbfc02536a6c31e2f145f16e.pdf]

**Table 3**

Univariate analysis for OS and CSS in training cohort

| Category                     | Overall survival         | Recurrence-specific survival |
|------------------------------|--------------------------|------------------------------|
|                              | <i>P</i> (Log-rank test) | <i>P</i> (grey's test)       |
| <b>Age(year)</b>             |                          |                              |
| <44 vs. 44-67                | <0.001                   | <0.001                       |
| <44 vs. >67                  | <0.001                   | <0.001                       |
| <b>Year at diagnosis</b>     |                          |                              |
| 2004-2009 vs. 2010-2015      | 0.023                    | 0.076                        |
| <b>Marital status</b>        |                          |                              |
| Married vs. Single           | 0.009                    | 0.012                        |
| Married vs. Other            | <0.001                   | 0.031                        |
| <b>Race</b>                  |                          |                              |
| White vs. Black              | 0.025                    | 0.034                        |
| White vs. Other <sup>†</sup> | 0.549                    | 0.264                        |
| <b>Grade<sup>‡</sup></b>     |                          |                              |
| Low vs. High                 | <0.001                   | <0.001                       |
| <b>Stage</b>                 |                          |                              |
| I vs II                      | <0.001                   | <0.001                       |
| I vs III                     | <0.001                   | <0.001                       |
| I vs IV                      | <0.001                   | <0.001                       |
| <b>Tumor size</b>            |                          |                              |
| <2 cm vs. 2-4 cm             | <0.001                   | <0.001                       |
| <2 cm vs. >4 cm              | <0.001                   | <0.001                       |
| <b>Metastasis</b>            |                          |                              |
| Absent vs. Present           | <0.001                   | <0.001                       |
| <b>Surgery</b>               |                          |                              |
| Performed vs. None           | <0.001                   | <0.001                       |
| <b>Radiotherapy</b>          |                          |                              |
| No                           | <0.001                   | <0.001                       |
| <b>Chemotherapy</b>          |                          |                              |
| Yes vs. No                   | 0.034                    | <0.001                       |

<sup>†</sup>American Indian/Alaskan Native, Asian/Pacific Islander<sup>‡</sup>Low: Grade I (well differentiated) and Grade II (moderately differentiated); High: Grade III (poorly differentiated) and Grade IV (undifferentiated anaplastic).
