# Supplementary material for: Construction and Validation of the Prognostic Model for Patients With Neuroendocrine Cervical Carcinoma: A Competing Risk Nomogram Analysis
Source: Research Square preprint supplement (doi:10.21203/rs.3.rs-127105/v1), 2020-12-23
Supplement: Supplementary file 2 [file ed2f025fe578c68b576ab954.pdf]

**Table 1**

Demographics and Clinicopathologic Characteristics of SEER Patients With cNET

| Category                 | Training cohort (n=628) | Internal validation cohort (n=266) | Total cohort (n=894) | <i>P</i> |
|--------------------------|-------------------------|------------------------------------|----------------------|----------|
|                          | No. of patients (%)     | No. of patients (%)                | No. of patients (%)  |          |
| <b>Age(year)</b>         |                         |                                    |                      | 0.498    |
| <44                      | 268 (42.7%)             | 104 (39.1%)                        | 372 (41.6%)          |          |
| 44-67                    | 263 (41.9%)             | 114 (42.9%)                        | 377 (42.2%)          |          |
| >67                      | 97 (15.4%)              | 48 (18.0%)                         | 145 (16.2%)          |          |
| <b>Year at diagnosis</b> |                         |                                    |                      | 0.188    |
| 2004-2009                | 294 (46.8%)             | 138 (51.9%)                        | 432 (48.3%)          |          |
| 2010-2015                | 334 (53.2%)             | 128 (48.1%)                        | 462 (51.7%)          |          |
| <b>Marital status</b>    |                         |                                    |                      | 0.901    |
| Married                  | 281 (44.7%)             | 120 (45.1%)                        | 401 (44.9%)          |          |
| Single                   | 247 (39.4%)             | 101 (38.0%)                        | 348 (38.9%)          |          |
| Other                    | 100 (15.9%)             | 45 (16.9%)                         | 145 (16.2%)          |          |
| <b>Race</b>              |                         |                                    |                      | 0.275    |
| White                    | 456 (72.6%)             | 180 (67.7%)                        | 636 (71.1%)          |          |
| Black                    | 101 (16.1%)             | 47 (17.6%)                         | 148 (16.6%)          |          |
| Other <sup>†</sup>       | 71 (11.3%)              | 39 (14.7%)                         | 110 (12.3%)          |          |
| <b>Grade<sup>‡</sup></b> |                         |                                    |                      | 0.208    |
| Low                      | 44 (7.0%)               | 14 (5.3%)                          | 58 (6.5%)            |          |
| High                     | 584 (93.0%)             | 252 (94.7%)                        | 836 (93.5%)          |          |
| <b>Stage</b>             |                         |                                    |                      | 0.501    |
| I                        | 298 (47.5%)             | 113 (42.5%)                        | 411 (46.0%)          |          |
| II                       | 143 (22.8%)             | 69 (25.9%)                         | 212 (23.7%)          |          |
| III                      | 136 (21.6%)             | 64 (24.1%)                         | 200 (22.4%)          |          |
| IV                       | 51 (8.1%)               | 20 (7.5%)                          | 71 (7.9%)            |          |
| <b>Tumor size</b>        |                         |                                    |                      | 0.726    |
| <2 cm                    | 142 (22.6%)             | 54 (20.3%)                         | 196 (21.9%)          |          |
| 2-4 cm                   | 121 (19.3%)             | 51 (19.2%)                         | 172 (19.2%)          |          |
| >4 cm                    | 365 (58.1%)             | 161 (60.5%)                        | 526 (58.8%)          |          |
| <b>Metastasis</b>        |                         |                                    |                      | 0.625    |
| Absent                   | 455 (72.5%)             | 188 (70.7%)                        | 643 (71.9%)          |          |
| Present                  | 173 (27.5%)             | 78 (29.3%)                         | 251 (28.1%)          |          |
| <b>Surgery</b>           |                         |                                    |                      | 0.714    |
| Performed                | 293 (46.7%)             | 120 (45.1%)                        | 413 (46.2%)          |          |
| None                     | 335 (53.3%)             | 146 (54.9%)                        | 481 (53.8%)          |          |
| <b>Radiotherapy</b>      |                         |                                    |                      | 0.653    |
| Yes                      | 247 (39.3%)             | 100 (37.6%)                        | 347 (38.8%)          |          |
| No                       | 381 (60.7%)             | 166 (62.4%)                        | 547 (61.2%)          |          |
| <b>Chemotherapy</b>      |                         |                                    |                      | 0.917    |
| Yes                      | 406 (64.6%)             | 171 (64.3%)                        | 577 (64.5%)          |          |
| No                       | 222 (35.4%)             | 95 (35.7%)                         | 317 (35.5%)          |          |

<sup>†</sup>American Indian/Alaskan Native, Asian/Pacific Islander<sup>‡</sup>Low: Grade I (well differentiated) and Grade II (moderately differentiated); High: Grade III (poorly differentiated) and Grade IV (undifferentiated anaplastic).
